# Supplementary material for: Pilot study to define criteria for Pituitary Tumors Centers of Excellence (PTCOE): results of an audit of leading international centers
Source: PubMed Central journal article supplement (PMC10539196; doi:10.1007/s11102-023-01345-0), 2023-08-28
Supplement: 11102_2023_1345_MOESM2_ESM.pdf [file 11102_2023_1345_MOESM2_ESM.pdf]

# Evaluation form for PTCOE validation criteria study.

CONFIDENTIAL

We really thank you for accepting to revise data provided by PTCOE candidate.

We kindly ask you to score every item from 1 (poor) to 5 (excellent).

## GENERAL-INTRODUCTION

Center facilities

|          |                |          |               |               |
|----------|----------------|----------|---------------|---------------|
| 1 = poor | 2 = borderline | 3 = good | 4 = very good | 5 = excellent |
|----------|----------------|----------|---------------|---------------|

Clinical multidisciplinary activities

|          |                |          |               |               |
|----------|----------------|----------|---------------|---------------|
| 1 = poor | 2 = borderline | 3 = good | 4 = very good | 5 = excellent |
|----------|----------------|----------|---------------|---------------|

Education/formation multidisciplinary activities

|          |                |          |               |               |
|----------|----------------|----------|---------------|---------------|
| 1 = poor | 2 = borderline | 3 = good | 4 = very good | 5 = excellent |
|----------|----------------|----------|---------------|---------------|

## ENDOCRINOLOGY UNIT

Clinical activities

|          |                |          |               |               |
|----------|----------------|----------|---------------|---------------|
| 1 = poor | 2 = borderline | 3 = good | 4 = very good | 5 = excellent |
|----------|----------------|----------|---------------|---------------|

Research/publication/congressual activities

|          |                |          |               |               |
|----------|----------------|----------|---------------|---------------|
| 1 = poor | 2 = borderline | 3 = good | 4 = very good | 5 = excellent |
|----------|----------------|----------|---------------|---------------|

Trials

|          |                |          |               |               |
|----------|----------------|----------|---------------|---------------|
| 1 = poor | 2 = borderline | 3 = good | 4 = very good | 5 = excellent |
|----------|----------------|----------|---------------|---------------|

## NEUROSURGERY UNIT

Clinical activities

|          |                |          |               |               |
|----------|----------------|----------|---------------|---------------|
| 1 = poor | 2 = borderline | 3 = good | 4 = very good | 5 = excellent |
|----------|----------------|----------|---------------|---------------|

Complications

|          |                |          |               |               |
|----------|----------------|----------|---------------|---------------|
| 1 = poor | 2 = borderline | 3 = good | 4 = very good | 5 = excellent |
|----------|----------------|----------|---------------|---------------|

Research/publication/congressual activities

|          |                |          |               |               |
|----------|----------------|----------|---------------|---------------|
| 1 = poor | 2 = borderline | 3 = good | 4 = very good | 5 = excellent |
|----------|----------------|----------|---------------|---------------|

Trials

|          |                |          |               |               |
|----------|----------------|----------|---------------|---------------|
| 1 = poor | 2 = borderline | 3 = good | 4 = very good | 5 = excellent |
|----------|----------------|----------|---------------|---------------|

## NEURORADIOLOGY UNIT

Facilities

|          |                |          |               |               |
|----------|----------------|----------|---------------|---------------|
| 1 = poor | 2 = borderline | 3 = good | 4 = very good | 5 = excellent |
|----------|----------------|----------|---------------|---------------|

Clinical activities

|          |                |          |               |               |
|----------|----------------|----------|---------------|---------------|
| 1 = poor | 2 = borderline | 3 = good | 4 = very good | 5 = excellent |
|----------|----------------|----------|---------------|---------------|

## NEUROPATHOLOGY UNIT

Facilities

|          |                |          |               |               |
|----------|----------------|----------|---------------|---------------|
| 1 = poor | 2 = borderline | 3 = good | 4 = very good | 5 = excellent |
|----------|----------------|----------|---------------|---------------|

RADIOTHERAPY – RADIO ONCOLOGY UNIT

Clinical activities

|          |                |          |               |               |
|----------|----------------|----------|---------------|---------------|
| 1 = poor | 2 = borderline | 3 = good | 4 = very good | 5 = excellent |
|----------|----------------|----------|---------------|---------------|

OTHER UNITS

Availability of different clinical experts and clinical exams

|          |                |          |               |               |
|----------|----------------|----------|---------------|---------------|
| 1 = poor | 2 = borderline | 3 = good | 4 = very good | 5 = excellent |
|----------|----------------|----------|---------------|---------------|

General comments

Max. 2000 characters
